# Supplementary material for: Stability and the electronic and optical properties of two-dimensional iridium trihalides with promising applications in photocatalytic water splitting
Source: Royal Society of Chemistry journal article supplement (doi:10.1039/d3cp01186k), 2023-01-01
Supplement: d3cp01186k1.pdf [file d3cp01186k1.pdf]

## Supplementary Material

### Stability, electronic, and optical properties of two-dimensional iridium trihalides with promising applications in photocatalytic water splitting

Ying-Xue Feng,<sup>a</sup> Qing-Yan Rong,<sup>a</sup> Zhang-Lin Fang, Wen-Zhi Xiao<sup>a\*</sup>

<sup>a</sup> School of Science, Hunan Institute of Engineering, Xiangtan 411104, China

<sup>b</sup> School of Physics and Electronics, Hunan University, Changsha 410082, China

#### Contents:

#### Figure S1:

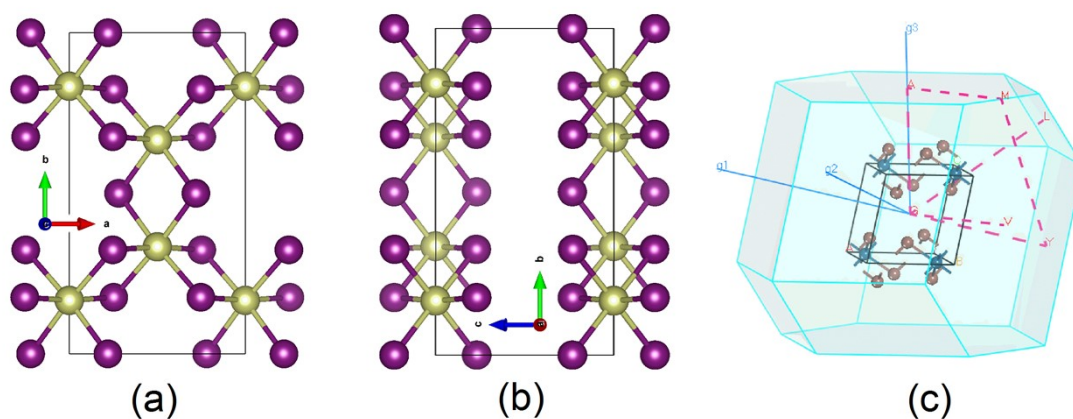

**Figure S1** (a) Top and (b) side views of the crystal structure of the bulk phase of  $\alpha$ - $\text{IrX}_3$  ( $X = \text{Cl}, \text{Br}, \text{I}$ ) in the representation of the conventional cell. (c) High symmetry  $k$ -points of the Brillouin zone for  $\alpha$ - $\text{IrX}_3$  and the path along which the band structure is evaluated.

\*\*Corresponding author: [xiaowenzhi@hnie.edu.cn](mailto:xiaowenzhi@hnie.edu.cn)

**Figure S2:**

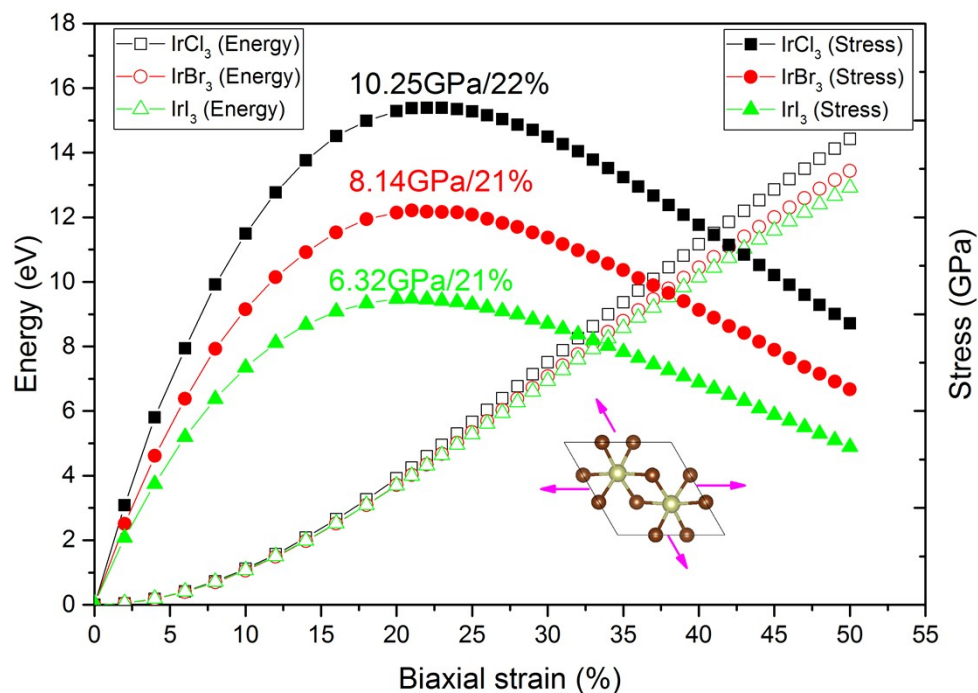

**Figure S2.** The change of strain energy and the created stress in the  $\text{IrX}_3$  monolayers under applied biaxial strain. Because a vacuum space is left along the  $z$  direction in the unit cell, the calculated in-plane stress components must be rescaled<sup>[1,2]</sup> based on the effective layer thickness  $d_0$  of  $\text{IrX}_3$  monolayers. We chose the lattice constant  $c$  of bulk  $\text{IrX}_3$  as the  $d_0$ , as list in Table S1, and rescale the in-plane stress components by  $h/d_0$ , where  $h$  is the length of the cell along  $z$  axis.

Table S1. Calculated lattice constant (in Å) at PBE level, and band-gap  $E_g$  (in eV) of  $\alpha\text{-IrX}_3$  bulk at different levels. The asterisk (\*) means the experimental results.

| Structure               | $a$             | $b$              | $c$             | $E_g$ with different methods |         |       |            |
|-------------------------|-----------------|------------------|-----------------|------------------------------|---------|-------|------------|
|                         |                 |                  |                 | PBE                          | PBE-SOC | HSE06 | experiment |
| $\text{IrCl}_3$         | 6.092           | 10.558           | 5.629           | 1.846                        | 1.750   | 3.264 |            |
| $\text{IrCl}_3^{[3]}$   | $5.99 \pm 0.01$ | $10.37 \pm 0.02$ | $5.99 \pm 0.01$ |                              |         |       |            |
| $\text{IrBr}_3$         | 6.408           | 11.116           | 5.984           | 1.432                        | 1.380   | 2.704 |            |
| $\text{IrBr}_3^{* [4]}$ | 6.30            | 10.98            | 6.34            |                              |         |       |            |
| $\text{IrI}_3$          | 6.867           | 11.901           | 6.490           | 1.175                        | 1.123   | 2.217 |            |
| $\text{IrI}_3^{[5]}$    | 6.802           | 11.791           | 6.864           | 1.0                          |         |       | 1.49       |
| $\text{IrI}_3^{*[11]}$  | 6.74            | 11.75            | 6.80            |                              |         |       |            |

**Figure S3:**

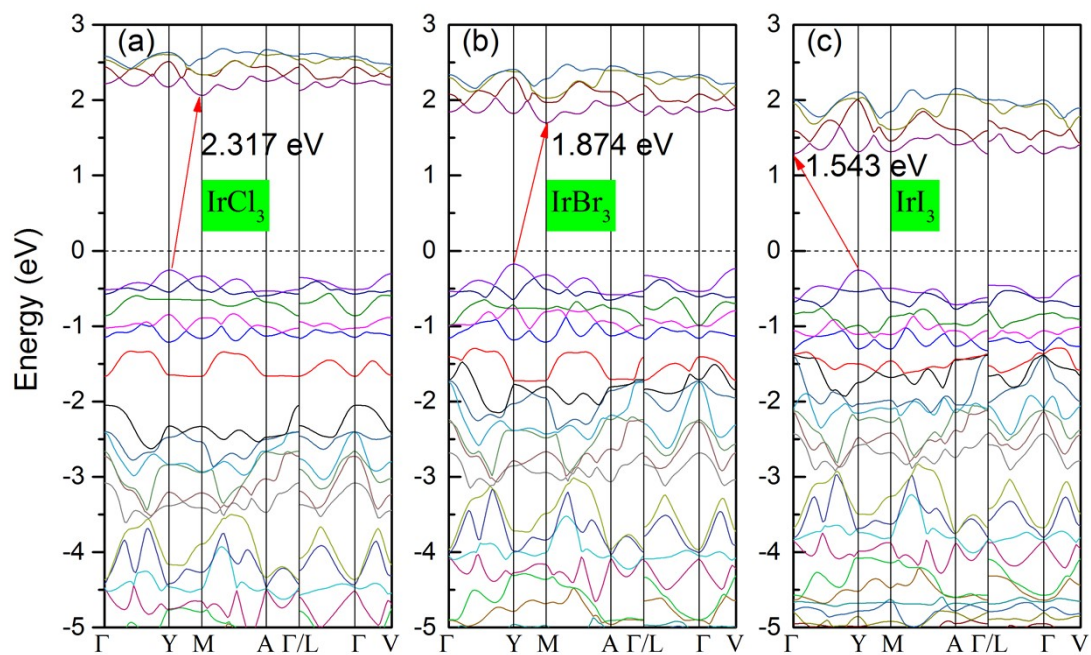

**Figure S3.** Electronic structure of bulk  $\text{IrX}_3$  obtained from HSE functional with 10% of the exact exchange.

**Figure S4:**

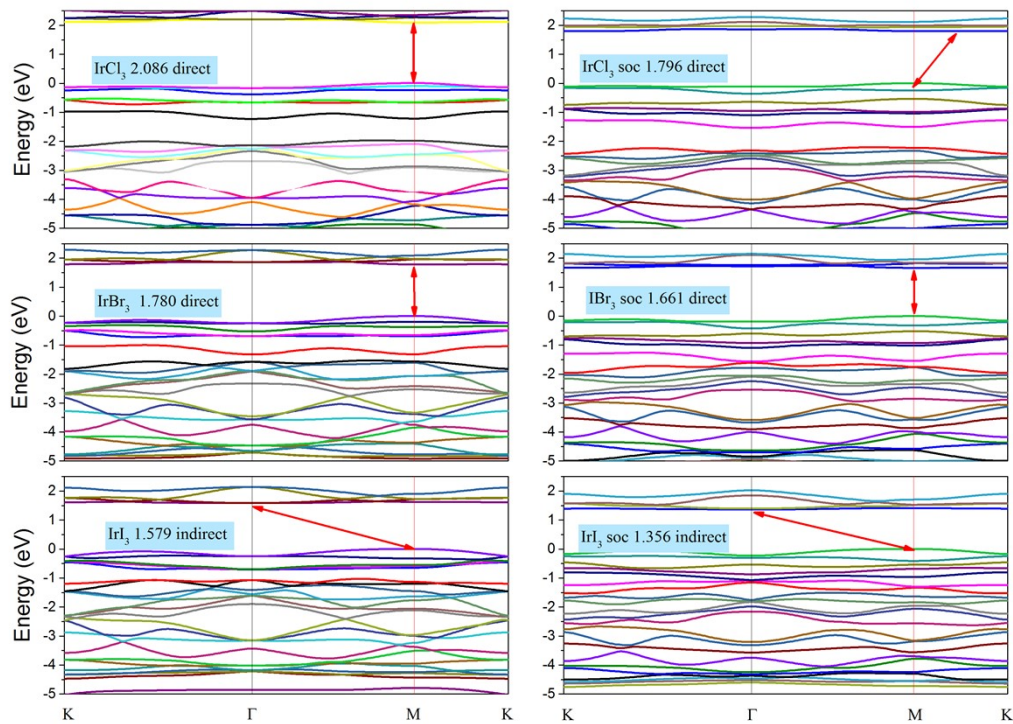

**Figure S4.** Electronic structure of monolayer IrX<sub>3</sub> obtained from (left panel) PBE and (right panel) PBE + SOC methods.

**Figure S5:**

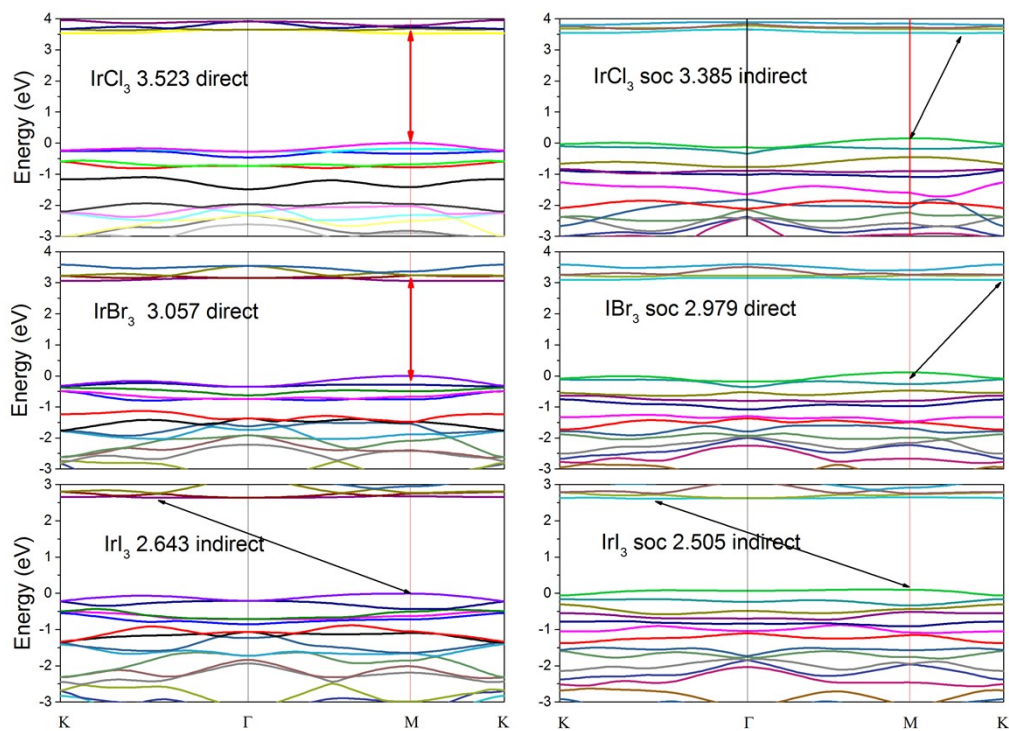

**Figure S5.** Electronic structure of monolayer  $\text{IrX}_3$  obtained from (left panel) HSE06 and (right panel) HSE06 + SOC methods.

**Figure S6.**

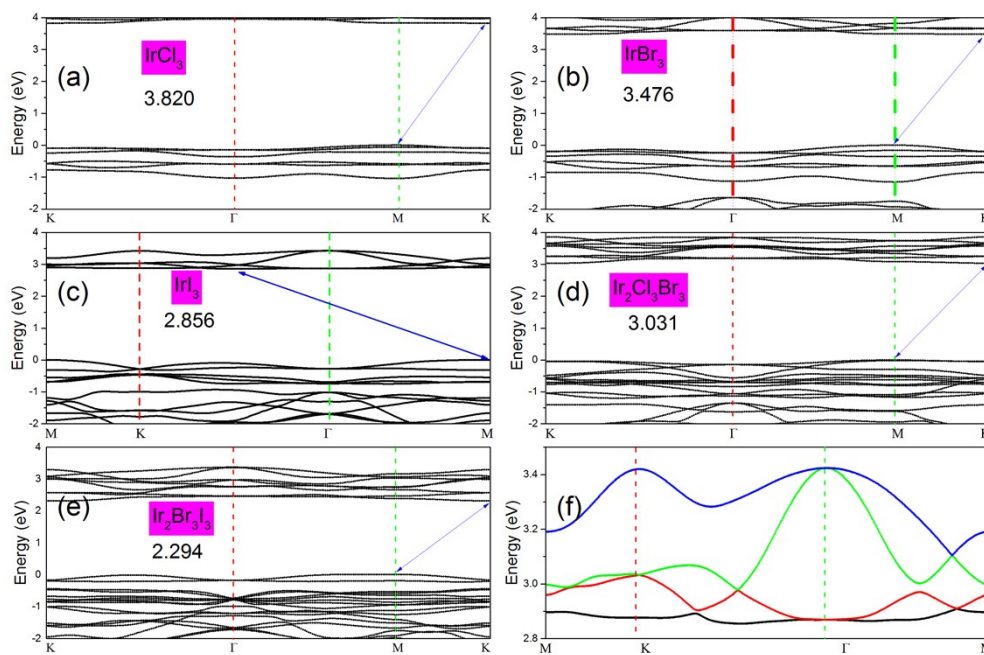

**Figure S6.** Electronic structure of monolayers (a) IrCl<sub>3</sub>, (b) IrBr<sub>3</sub>, (c) IrI<sub>3</sub>, and their heterojunctions (d) IrCl<sub>3</sub>:IrBr<sub>3</sub> and (e) IrBr<sub>3</sub>:IrI<sub>3</sub> obtained from G<sub>0</sub>W<sub>0</sub> method. (f) The band structures of IrI<sub>3</sub> near the valence band maximum.

**Figure S7.**

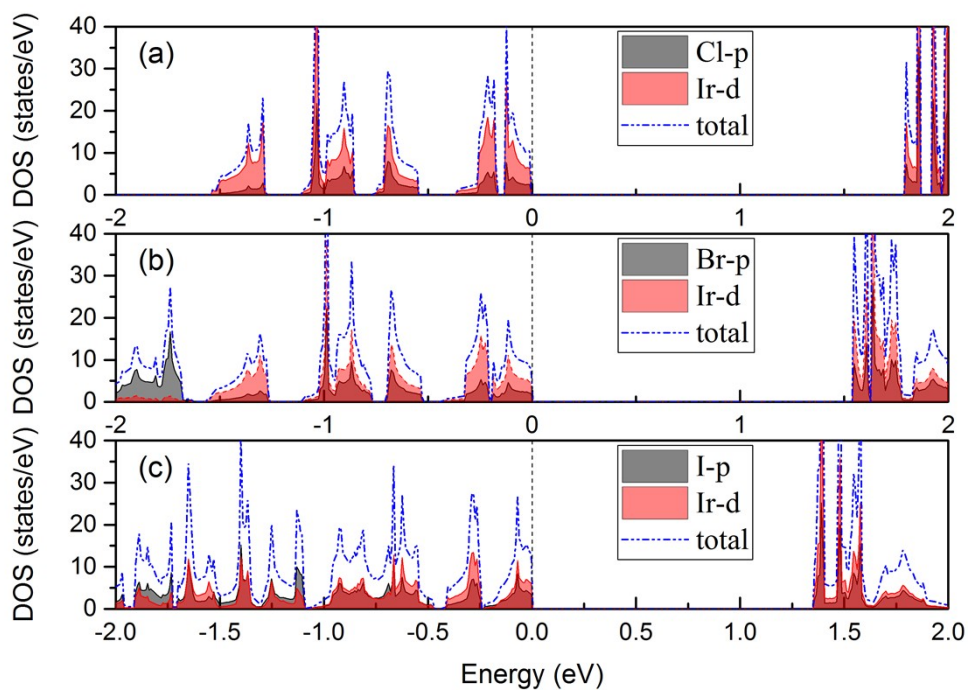

**Figure S7.** Total and projected DOS of monolayers (a) IrCl<sub>3</sub>, (b) IrBr<sub>3</sub>, (c) IrI<sub>3</sub> obtained at PBE+SOC level.

**Figure S8.**

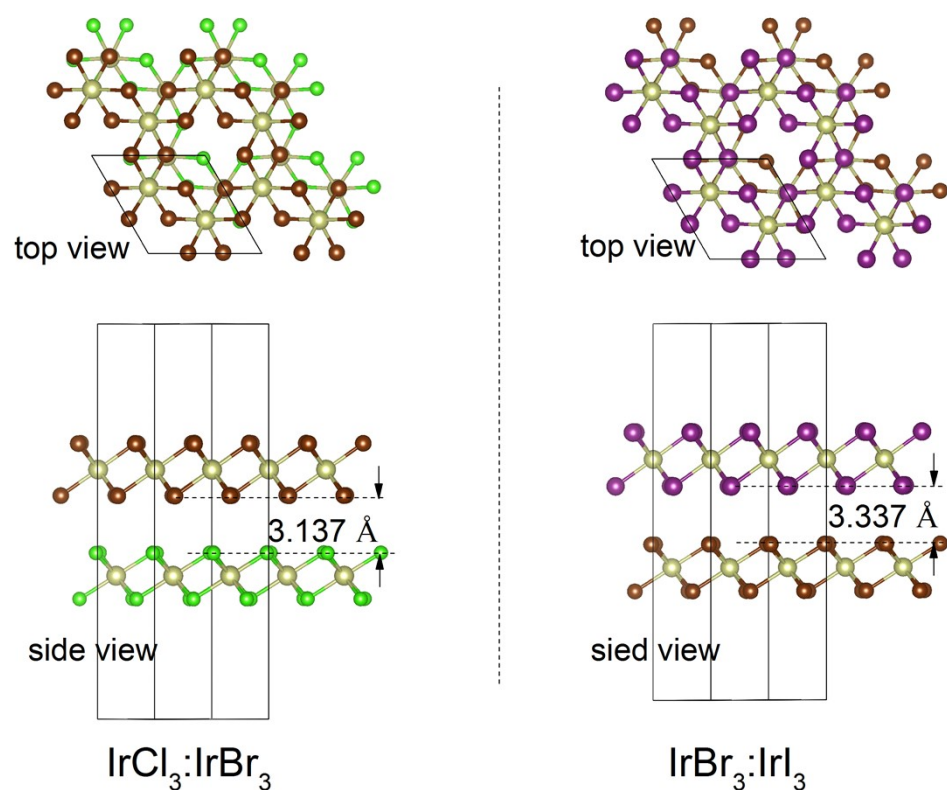

**Figure S8.** Top and lateral views of IrCl<sub>3</sub>:IrBr<sub>3</sub> and IrBr<sub>3</sub>:Irl<sub>3</sub> van der Waals heterostructures.

## References

- [1] F. Liu, P. Ming and J. Li, Ab initio calculation of ideal strength and phonon instability of graphene under tension, *Phys. Rev. B*, 2007, 76(6), 064120.
- [2] T. Li, Ideal strength and phonon instability in single-layer MoS<sub>2</sub>, *Phys. Rev. B*, 2012, 85(23), 235407.
- [3] K. Brodersen, F. Moers and H. Schnering, Zur Struktur des Iridium (III)-und des Ruthenium (III)-chlorids, *Sci. Nat.*, 1965, 52(9), 205-206.
- [4] K. Brodersen, Structure of  $\beta$ -RuCl<sub>3</sub>, RuI<sub>3</sub>, IrBr<sub>3</sub>, and IrI<sub>3</sub>, *Angew. Chem. Int. Ed. in English*, 1968, 7(2), 148-148.
- [5] D. Ni, K. P. Devlin, G. Cheng, X. Gui, W. Xie, N. Yao and R. J. Cava, The honeycomb and hyperhoneycomb polymorphs of IrI<sub>3</sub>, *J. Solid State Chem.*, 2022, 312, 123240.



- 
- <sup>1</sup> F. Liu, P. Ming and J. Li, Ab initio calculation of ideal strength and phonon instability of graphene under tension, *Phys. Rev. B*, 2007, 76(6), 064120.
- <sup>2</sup> T. Li, Ideal strength and phonon instability in single-layer MoS<sub>2</sub>, *Phys. Rev. B*, 2012, 85(23), 235407.
- <sup>3</sup> K. Brodersen, F. Moers and H. Schnering, Zur Struktur des Iridium (III)-und des Ruthenium (III)-chlorids, *Sci. Nat.*, 1965, 52(9), 205-206.
- <sup>4</sup> K. Brodersen, Structure of  $\beta$ -RuCl<sub>3</sub>, RuI<sub>3</sub>, IrBr<sub>3</sub>, and IrI<sub>3</sub>, *Angew. Chem. Int. Ed. in English*, 1968, 7(2), 148-148.
- <sup>5</sup> D. Ni, K. P. Devlin, G. Cheng, X. Gui, W. Xie, N. Yao and R. J. Cava, The honeycomb and hyperhoneycomb polymorphs of IrI<sub>3</sub>, *J. Solid State Chem.*, 2022, 312, 123240.
